# Supplementary material for: Seeking for Non-Zinc-Binding MMP-2 Inhibitors: Synthesis, Biological Evaluation and Molecular Modelling Studies
Source: PubMed Central journal article supplement (PMC5085792; doi:10.3390/ijms17101768), 2016-10-22
Supplement: ijms-17-01768-s001.pdf [file ijms-17-01768-s001.pdf]

# Supplementary Materials: Seeking for Non-Zinc-Binding MMP-2 Inhibitors: Synthesis, Biological Evaluation and Molecular Modelling Studies

Alessandra Ammazalorso, Barbara De Filippis, Cristina Campestre, Antonio Laghezza, Alessandro Marrone, Rosa Amoroso, Paolo Tortorella and Mariangela Agamennone

## Cross-docking calculations

A cross-docking study has been carried out by evaluating the best performing MMP structures in correctly relocate the cognate ligand of X-ray complexes.

To this aim highest resolution structures (<2.5 Å) were retrieved from the PDB for MMP-2, MMP-8 and MMP-13 (Table S1).

MMP structures were prepared as reported in the Materials and methods section of the article.

Cognate ligands were extracted from the complexes; their structure has been fixed (bond order, hydrogen atoms, and protonation state). Ligands were submitted to minimization and conformational search such as reported for synthesized ligands.

Global minimum geometry of ligands was used for docking calculations in each MMP structure.

Highest ranking pose for each ligand in each receptor structure has been compared to the experimental one. Similarity to the experimental data has been evaluated by measuring the RMSD value.

RMSD calculated for all ligands are reported in Tables S2, S3 and S4 for, respectively MMP-2, MMP-8 and MMP-13.

**Table S1.** PDB-IDs of X-ray structures of MMP-2, MMP-8 and MMP-13 retrieved from PDB.

| MMP-2            | MMP-8                                          | MMP-13                                                                             |
|------------------|------------------------------------------------|------------------------------------------------------------------------------------|
| 3AYU, 1HOV, 1QIB | 1I76, 1KBC, 1MNC, 1ZP5, 1ZSO, 3DNG, 3DPE, 3DPF | 1XUC, 2E2D, 2OZR, 3LJZ, 3WV3, 3ZXH, 3O2X, 4A7B, 456C, 1FLS, 3KRY, 1YOU, 2D1N, 3TVC |

**Table S2.** RMSD values obtained aligning best docked pose to experimental geometry in MMP-2 structures.

| Ligand/Receptor | 1HOV0001 | 1HOV0002 | 1HOV0003 | 1HOV0004 | 1HOV0005 | 1HOV0006 | 1HOV0007 |
|-----------------|----------|----------|----------|----------|----------|----------|----------|
| 1HOV            | 2.897    | 15.3     | 1.78     | 9.1      | 1.61     | 1.68     | 7.44     |
| Ligand/Receptor | 1HOV0008 | 1HOV0009 | 1HOV0010 | 1HOV0011 | 3AYU     | 1QIB     |          |
| 1HOV            | 4.79     | 1.68     | 1.89     | 2.56     | 5.39     | 4.29     |          |

**Table S3.** RMSD values obtained aligning best docked pose to experimental geometry in MMP-8 structures.

| Ligand/Receptor | 1I76  | 1MNC  | 1KBC  | 1KBC_B | 1ZP5 | 1ZSO | 3DNG | 3DPE  | 3DPF |
|-----------------|-------|-------|-------|--------|------|------|------|-------|------|
| 1I76            | 2.93  | 2.46  | 2.77  | 2.7    | 2.82 | 2.91 | 3.11 | 2.82  | 3.36 |
| 1MNC            | 0.61  | 0.57  | 0.68  | 2.21   | 0.63 | 6.62 | 0.42 | 0.68  | 0.87 |
| 1KBC            | 1.7   | 1.87  | 0.63  | 1.78   | 1.75 | 1.99 | 1.7  | 1.56  | 1.55 |
| 1ZP5            | 1.51  | 2.41  | 1.84  | 1.73   | 2.15 | 2.66 | 1.11 | 1.66  | 2.08 |
| 3DNG            | 15.59 | 15.5  | 15.35 | 15.6   | 14.7 | 14.5 | 0.91 | 15.41 | 1.44 |
| 3DPE            | 14.4  | 13.15 | 13.3  | 11.6   | 13   | 12.9 | 14.7 | 14    | 12.4 |
| 3DPF            | 14.7  | 11.9  | 14.9  | 14.3   | 13.6 | 13.9 | 2.1  | 1.56  | 1.84 |

**Table S4.** RMSD values obtained aligning best docked pose to experimental geometry in MMP-13 structures.

| Ligand/<br>Receptor | 1FLS  | 1XUC  | 1XUC_B | 1YOU  | 2D1N | 2E2D  | 2OZR | 2OZR_F | 3O2X  | 3O2X_B | 3O2X_C |
|---------------------|-------|-------|--------|-------|------|-------|------|--------|-------|--------|--------|
| 4JP4                | 7.26  | 8.52  | 3.06   | 2.24  | 2.33 | 3.97  | 3.4  | 3.07   | 2.86  | 2.25   | 3.35   |
| 4JPA                | 8     | 7.03  | 1.77   | 13.4  | 13.6 | 7.45  | 13.6 | 1.72   | 2.27  | 14.2   | 12.8   |
| 2OW9                | 14.7  | 10.2  | 15.3   | 13.6  | 15.1 | 14.7  | 1.96 | 0.7    | 16.6  | 14.2   | 16.5   |
| 456C                | 1.88  | 1.47  | 1.19   | 1.34  | 1.44 | 1.81  | 1.14 | 1.53   | 1.4   | 1.32   | 1.58   |
| 1XUC                | 15.6  | 12.1  | 13.4   | 14.93 | 13.4 | 16.3  | 16.2 | 3.65   | 14.4  | 13.4   | 14.4   |
| 1XUD                | 15.8  | 14    | 15.5   | 15.9  | 8.88 | 16.9  | 3.9  | 2.36   | 15.21 | 12     | 14.9   |
| 1XUR                | 15.8  | 0.39  | 0.53   | 15.66 | 14.4 | 7.23  | 2.03 | 1.45   | 2.38  | 14.7   | 15.3   |
| 1YOU                | 6.88  | 17.2  | 7.82   | 4.98  | 9.05 | 7.38  | 3.13 | 18.1   | 8.84  | 7.77   | 8.71   |
| 1ZTQ                | 12.29 | 1.12  | 1.66   | 1.74  | 0.93 | 3.38  | 1.46 | 1.72   | 1.51  | 1.74   | 1.78   |
| 2OZR                | 14.56 | 4.82  | 14.7   | 14.1  | 14.5 | 15.4  | 1.21 | 4.71   | 5.1   | 14.4   | 17.3   |
| 3ELM                | 8.28  | 4.67  | 4.34   | 1.01  | 3.81 | 4.95  | 8.04 | 1.14   | 5.34  | 6.31   | 3.93   |
| 3I7G                | 8.52  | 5.36  | 6.75   | 4.8   | 14.4 | 1.14  | 1.13 | 1.31   | 13.1  | 1.1    | 8.79   |
| 3I7I                | 11.1  | 1.69  | 1.27   | 6.53  | 14.4 | 1.86  | 1.63 | 1.6    | 6.79  | 1.6    | 1.52   |
| 3KEJ                | 14.7  | 11.02 | 2.12   | 11.7  | 11.9 | 16.4  | 2.6  | 2.1    | 11.8  | 11.6   | 14.7   |
| 3KEK                | 15    | 1.64  | 2.43   | 16.5  | 11.6 | 11.6  | 17.1 | 1.16   | 11.7  | 10     | 12     |
| 3KRY                | 3.68  | 2.55  | 2.37   | 2.04  | 1.68 | 2.32  | 3.6  | 2.35   | 1.6   | 2.5    | 9.11   |
| 3LJZ                | 7.93  | 2.59  | 2.16   | 2.77  | 2.51 | 2.03  | 2.95 | 2.28   | 7.43  | 2.23   | 6.46   |
| 3TVC                | 3.96  | 2.16  | 2.35   | 1.91  | 2.3  | 2.11  | 2.09 | 2.53   | 3.05  | 2.28   | 2.59   |
| 3WV3                | 11.4  | 1.86  | 11.2   | 12.5  | 9.66 | 9.74  | 2.95 | 0.66   | 0.7   | 1.03   | 11.3   |
| 3ZXH                | 3.65  | 2.52  | 5.54   | 0.57  | 5.7  | 2.54  | 4.43 | 5.46   | 2.95  | 2.03   | 2.16   |
| 4JP4                | 2.77  | 2.63  | 3.52   | 4.4   | 1.95 | 3.5   | 5.36 | 3.65   | 3.14  | 3.09   | 4JP4   |
| 4JPA                | 1.84  | 13.6  | 2.31   | 13.4  | 13.6 | 13.4  | 3.57 | 7.35   | 1.75  | 1.82   | 4JPA   |
| 2OW9                | 14.7  | 15.4  | 16.3   | 14.7  | 14.2 | 14.6  | 13.3 | 15.6   | 15.1  | 14.9   | 2OW9   |
| 456C                | 12.4  | 11.8  | 1.47   | 1.43  | 1.24 | 1.42  | 3.31 | 7.16   | 2.36  | 1.53   | 456C   |
| 1XUC                | 13.6  | 13.3  | 15.1   | 13.9  | 13.7 | 13.8  | 9.79 | 13.6   | 12.6  | 14.9   | 1XUC   |
| 1XUD                | 12.1  | 12    | 12.2   | 16.6  | 15.5 | 16.6  | 11.6 | 12     | 11.9  | 15.3   | 1XUD   |
| 1XUR                | 14.7  | 13.8  | 15.3   | 12    | 15.4 | 11.23 | 4.82 | 15.1   | 14.7  | 15.1   | 1XUR   |
| 1YOU                | 3.54  | 3.6   | 3.27   | 6.82  | 8.77 | 6.83  | 4.79 | 8.08   | 4.88  | 3.21   | 1YOU   |
| 1ZTQ                | 2.61  | 2.6   | 1.88   | 1.33  | 2.26 | 2.92  | 2.73 | 3.25   | 1.03  | 1.02   | 1ZTQ   |
| 2OZR                | 14.5  | 14.7  | 15.9   | 16.2  | 14.6 | 14.5  | 14.1 | 15.4   | 14.82 | 15.3   | 2OZR   |
| 3ELM                | 7.7   | 7.34  | 7.5    | 1.46  | 3.29 | 1.18  | 7.7  | 7.43   | 6.77  | 2.81   | 3ELM   |
| 3I7G                | 1.09  | 12.5  | 4.48   | 4.78  | 1.1  | 5.77  | 13.8 | 1.14   | 5.15  | 1.22   | 3I7G   |
| 3I7I                | 1.64  | 1.64  | 13.5   | 6.96  | 6.23 | 5.14  | 1.54 | 2.2    | 2.02  | 1.7    | 3I7I   |
| 3KEJ                | 12    | 11.6  | 11.8   | 16.2  | 12   | 11.9  | 15.1 | 16     | 1.12  | 11     | 3KEJ   |
| 3KEK                | 11.5  | 12.2  | 17.4   | 18.3  | 11.5 | 11.8  | 14.6 | 16.7   | 17.4  | 11.8   | 3KEK   |
| 3KRY                | 4.6   | 2.08  | 1.68   | 9.19  | 2.51 | 7.9   | 8.51 | 9.5    | 2.1   | 2.64   | 3KRY   |
| 3LJZ                | 2.46  | 2.86  | 1.91   | 1.6   | 2.43 | 2.19  | 2.25 | 1.31   | 2.2   | 1.86   | 3LJZ   |
| 3TVC                | 2.5   | 2.28  | 2.22   | 2.37  | 2.27 | 2.37  | 3.93 | 5.11   | 2.12  | 2.43   | 3TVC   |
| 3WV3                | 1.19  | 9.86  | 9.8    | 11.2  | 2.95 | 11.3  | 4.28 | 5.04   | 4.46  | 0.43   | 3WV3   |
| 3ZXH                | 2.41  | 6.48  | 5.66   | 2.86  | 5.57 | 2.86  | 4.5  | 3.18   | 2.3   | 2.28   | 3ZXH   |

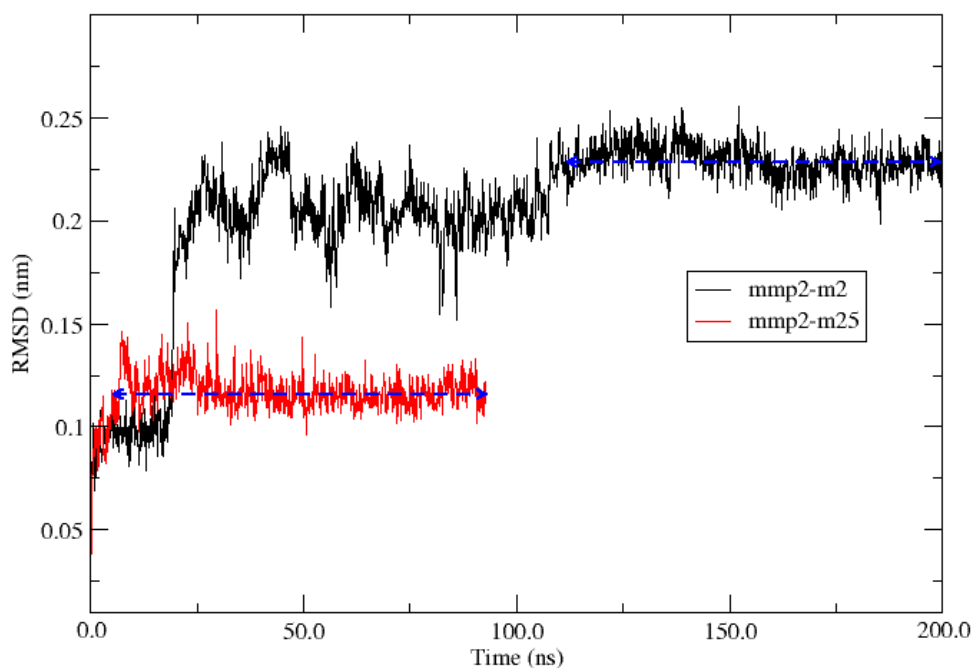

**Figure S1.** Root mean squared deviations of the backbone atom positions for the **1g** (black) and **1h** (red) bound complexes with MMP-2. Dashed arrows evidence stable segments of trajectory (last 90 ns).

## Chemistry

**N-Benzyl-N'-quinolin-3-ylurea (1a).** White solid (56% yield); DCM/MeOH 95:5 for chromatography; m.p. 206–208 °C;  $^1\text{H-NMR}$  ( $\text{DMSO-}d_6$ )  $\delta$  4.34 (d, 2H,  $J = 6.0$  Hz,  $\text{CH}_2\text{NH}$ ), 6.88 (t, 1H,  $J = 5.7$  Hz,  $\text{NHCH}_2$ ), 7.21–7.32 (m, 1H,  $\text{CHAr}$ ), 7.32 (d, 3H,  $J = 4.5$  Hz,  $\text{CHAr}$ ), 7.46–7.56 (m, 2H,  $\text{CHAr}$ ), 7.81 (dd, 1H,  $J = 6.0$  Hz,  $J = 1.5$  Hz,  $\text{CHAr}$ ), 7.88 (dd, 1H,  $J = 6.0$  Hz,  $J = 1.5$  Hz,  $\text{CHAr}$ ), 7.96 (d, 1H,  $J = 2.7$  Hz,  $\text{CHAr}$ ), 8.76 (d, 1H,  $J = 2.7$  Hz,  $\text{CHAr}$ ), 9.09 (s, 1H,  $\text{NHCO}$ );  $^{13}\text{C-NMR}$  ( $\text{DMSO-}d_6$ )  $\delta$  43.5, 127.4, 127.4, 127.5, 127.8, 127.8, 128.9, 129.0, 129.1, 134.9, 140.8, 143.9, 144.8, 155.9.

**N-Benzyl-N'-quinolin-4-ylurea (1b).** Yellowish solid (51% yield); DCM/MeOH 95:5 for chromatography; m.p. 167–169 °C;  $^1\text{H-NMR}$  ( $\text{DMSO-}d_6$ )  $\delta$  4.38 (d, 2H,  $J = 5.4$  Hz,  $\text{CH}_2\text{NH}$ ), 7.23–7.29 (m, 1H,  $\text{NHCH}_2$ ), 7.34–7.43 (m, 5H,  $\text{CHAr}$ ), 7.56–7.74 (m, 2H,  $\text{CHAr}$ ), 7.92 (d, 1H,  $J = 8.1$  Hz,  $\text{CHAr}$ ), 8.16 (d, 1H,  $J = 8.1$  Hz,  $\text{CHAr}$ ), 8.21 (d, 1H,  $J = 5.4$  Hz,  $\text{CHAr}$ ), 8.64 (d, 1H,  $J = 5.4$  Hz,  $\text{CHAr}$ ), 9.15 (bs, 1H,  $\text{NHAr}$ );  $^{13}\text{C-NMR}$  ( $\text{DMSO-}d_6$ )  $\delta$  43.3, 107.7, 119.6, 121.3, 125.9, 127.4, 127.8, 128.9, 129.6, 130.0, 140.0, 143.3, 148.8, 151.3, 155.0.

**N-Benzyl-N'-quinolin-5-ylurea (1c).** White-yellowish needles (46% yield); recrystallized from MeOH; m.p. 251 °C (dec);  $^1\text{H-NMR}$  ( $\text{DMSO-}d_6$ )  $\delta$  4.34 (d, 2H,  $J = 5.7$  Hz,  $\text{CH}_2\text{NH}$ ), 7.01 (t, 1H,  $J = 5.7$  Hz,  $\text{NHCH}_2$ ), 7.22–7.26 (m, 1H,  $\text{CHAr}$ ), 7.33 (d, 4H,  $J = 5.7$  Hz,  $\text{CHAr}$ ), 7.51–7.55 (d, 1H,  $J = 8.5$  Hz,  $\text{CHAr}$ ), 7.64 (d, 2H,  $J = 4.4$  Hz,  $\text{CHAr}$ ), 8.03–8.05 (m, 1H,  $\text{CHAr}$ ), 8.46–8.49 (dd, 1H,  $J = 8.5$  Hz,  $J = 1.4$  Hz,  $\text{CHAr}$ ), 8.76 (bs, 1H,  $\text{NHPh}$ ), 8.86–8.87 (dd, 1H,  $J = 4.1$  Hz,  $J = 1.6$  Hz,  $\text{CHAr}$ );  $^{13}\text{C-NMR}$  ( $\text{DMSO-}d_6$ )  $\delta$  43.6, 117.1, 121.1, 121.3, 123.7, 127.5, 127.9, 129.0, 130.1, 130.7, 136.2, 140.7, 148.8, 150.8, 156.1.

**N-Benzyl-N'-quinolin-8-ylurea (1d).** White solid (54% yield); DCM/MeOH 95:5 for chromatography;  $^1\text{H-NMR}$  ( $\text{CDCl}_3$ ):  $\delta$  4.49 (s, 2H,  $\text{CH}_2$ ); 7.24–7.43 (m, 7H,  $\text{CHAr}$ ); 7.52 (t,  $J = 6.0$  Hz, 1H,  $\text{CHAr}$ ); 8.14 (dd,  $J = 6.3$  Hz,  $J = 1.8$  Hz, 1H,  $\text{CHAr}$ ); 8.57 (dd,  $J = 6.6$  Hz,  $J = 1.5$  Hz, 1H,  $\text{CHAr}$ ); 8.70 (dd,  $J = 2.4$  Hz,  $J = 1.8$  Hz, 1H,  $\text{CHAr}$ ); 9.04 (s, 1H,  $\text{NH}$ );  $^{13}\text{C-NMR}$  ( $\text{CDCl}_3$ ):  $\delta$  43.8, 118.4, 120.5, 126.1, 126.2, 126.6, 128.3, 128.4, 128.4, 128.6, 129.9, 141.7, 141.9, 150.5, 173.6.

**N-Benzyl-N'-isoquinolin-1-ylurea (1e).** Yellow solid (67% yield); DCM/MeOH 95:5 for chromatography; m.p. 164–165 °C;  $^1\text{H-NMR}$  ( $\text{CDCl}_3$ )  $\delta$  4.67 (s, 2H,  $\text{CH}_2$ ), 7.22–7.33 (m, 3H,  $\text{CHAr}$ ),

7.35 (t, 2H,  $J = 7.2$  Hz, CHAr), 7.43 (d, 2H,  $J = 7.5$  Hz, CHAr), 7.52 (t, 1H,  $J = 7.8$  Hz, CHAr), 7.68 (t, 1H,  $J = 6.9$  Hz, CHAr), 7.76 (d, 1H,  $J = 8.1$  Hz, CHAr), 7.99 (d, 1H,  $J = 6.0$  Hz, CHAr), 8.19 (s, 1H, NH), 10.66 (s, 1H, NHPh);  $^{13}\text{C}$ -NMR ( $\text{CDCl}_3$ )  $\delta$  43.8, 118.4, 120.5, 126.1, 126.2, 126.5, 128.2, 128.4, 128.4, 128.6, 129.9, 141.7, 141.8, 150.5, 154.9.

**N-Benzyl-N'-isoquinolin-3-ylurea (1f).** Yellow solid (59% yield); cyclohexane/EtOAc 1:1 for chromatography; m.p. 168–170 °C;  $^1\text{H}$ -NMR ( $\text{CD}_3\text{OD}$ )  $\delta$  4.51 (s, 2H,  $\text{CH}_2$ ), 7.24–7.46 (m, 6H, CHAr), 7.60–7.66 (m, 1H, CHAr), 7.74 (d, 1H,  $J = 8.4$  Hz, CHAr), 7.93 (d, 1H,  $J = 8.7$  Hz, CHAr), 8.96 (s, 1H, CHAr);  $^{13}\text{C}$ -NMR ( $\text{CD}_3\text{OD}$ )  $\delta$  43.2, 104.7, 125.1, 125.5, 125.7, 126.9, 127.0, 127.6, 128.4, 131.0, 150.3.

**N-Benzyl-N'-isoquinolin-4-ylurea (1g).** White solid (56% yield); cyclohexane/EtOAc 7:3 for chromatography; m.p. 235–237 °C;  $^1\text{H}$ -NMR ( $\text{CD}_3\text{OD}$ )  $\delta$  4.44 (s, 1H,  $\text{CH}_2$ ), 7.34–7.36 (m, 5H, CHAr), 7.70 (t, 1H,  $J = 6.9$  Hz, CHAr), 7.81 (t, 1H,  $J = 6.9$  Hz, CHAr), 8.04 (d, 1H,  $J = 8.1$  Hz, CHAr), 8.10 (d, 1H,  $J = 8.1$  Hz, CHAr), 8.81 (s, 1H, CHAr), 8.98 (s, 1H, CHAr);  $^{13}\text{C}$ -NMR ( $\text{CD}_3\text{OD}$ )  $\delta$  43.6, 121.0, 127.0, 127.7, 128.1, 128.4, 129.2, 130.5, 130.9, 133.9, 135.5, 147.5, 157.2.

**N-Benzyl-N'-isoquinolin-5-ylurea (1h).** Yellowish solid (66% yield); recrystallized from MeOH; m.p. 248–249 °C;  $^1\text{H}$ -NMR ( $\text{DMSO}_d_6$ )  $\delta$  4.35 (d, 2H,  $J = 5.7$  Hz,  $\text{CH}_2\text{NH}$ ), 7.06 (t, 1H,  $J = 5.7$  Hz,  $\text{NHCH}_2$ ), 7.20–7.34 (m, 5H, CHAr), 7.58 (d, 1H,  $J = 7.8$  Hz, CHAr), 7.71 (d, 1H,  $J = 7.8$  Hz, CHAr), 7.91 (d, 1H,  $J = 6.0$  Hz, CHAr), 8.29 (d, 1H,  $J = 7.8$  Hz, CHAr), 8.51 (d, 1H,  $J = 6.0$  Hz, CHAr), 8.74 (bs, 1H, NHAr), 9.24 (s, 1H, CHAr);  $^{13}\text{C}$ -NMR ( $\text{DMSO}_d_6$ )  $\delta$  43.6, 115.0, 119.9, 121.8, 127.5, 127.9, 128.1, 128.2, 129.0, 129.4, 135.2, 140.6, 143.1, 153.3, 156.0.

**N-Benzyl-N'-isoquinolin-8-ylurea (1i).** Yellowish solid (49% yield); DCM/MeOH 95:5 for chromatography; m.p. 206–208 °C;  $^1\text{H}$ -NMR ( $\text{DMSO}_d_6$ )  $\delta$  4.36 (d, 2H,  $J = 5.4$  Hz,  $\text{CH}_2\text{NH}$ ), 7.08 (t, 1H,  $J = 5.4$  Hz,  $\text{NHCH}_2$ ), 7.22–7.35 (m, 5H, CHAr), 7.54 (d, 1H,  $J = 7.8$  Hz, CHAr), 7.65 (t, 1H,  $J = 7.5$  Hz, CHAr), 7.76 (d, 1H,  $J = 5.7$  Hz, CHAr), 8.14 (d, 1H,  $J = 7.5$  Hz, CHAr), 8.47 (d, 1H,  $J = 5.7$  Hz, CHAr), 9.01 (s, 1H, CHAr), 9.49 (bs, 1H, NHAr);  $^{13}\text{C}$ -NMR ( $\text{DMSO}_d_6$ )  $\delta$  43.4, 117.3, 120.6, 120.8, 120.9, 127.3, 127.6, 128.8, 131.3, 136.4, 136.6, 140.4, 143.1, 147.1, 155.7.

**N-Benzyl-N'-1H-indol-5-ylurea (1j).** Brown solid (53% yield); recrystallized from EtOAc; m.p. 197–198 °C;  $^1\text{H}$ -NMR ( $\text{CD}_3\text{OD}$ )  $\delta$  4.37 (s, 2H,  $\text{CH}_2\text{NH}$ ), 6.37 (d, 1H,  $J = 3.0$  Hz, CHAr), 7.00–7.03 (dd, 1H,  $J = 8.7$  Hz,  $J = 2.2$  Hz, CHAr), 7.18–7.32 (m, 7H, CHAr), 7.51 (d, 1H,  $J = 1.6$  Hz, CHAr);  $^{13}\text{C}$ -NMR ( $\text{CD}_3\text{OD}$ )  $\delta$  41.8, 99.5, 109.4, 111.5, 115.3, 123.6, 125.2, 125.4, 126.7, 126.9, 129.0, 132.1, 138.5, 156.7.

**N-Benzyl-N'-1H-indol-6-ylurea (1k).** White solid (42% yield); recrystallized from MeOH; m.p. 211–213 °C;  $^1\text{H}$ -NMR ( $\text{DMSO}_d_6$ )  $\delta$  4.28 (d, 2H,  $J = 6.0$  Hz,  $\text{CH}_2\text{NH}$ ), 6.27 (s, 1H, CHAr), 6.47 (t, 1H,  $J = 5.7$  Hz,  $\text{NHCH}_2$ ), 6.75 (d, 1H,  $J = 8.1$  Hz, CHAr), 7.15 (s, 1H, CHAr), 7.21–7.34 (m, 5H, CHAr), 7.73 (s, 1H, CHAr), 8.38 (s, 1H, NH), 10.83 (s, 1H, CHAr);  $^{13}\text{C}$ -NMR ( $\text{DMSO}_d_6$ )  $\delta$  43.4, 101.2, 101.4, 112.3, 120.4, 123.7, 124.7, 127.3, 127.8, 128.9, 135.2, 136.9, 141.2, 156.2.

**N-Benzyl-N'-1H-indazol-5-ylurea (1l).** Pink solid (59% yield); recrystallized from petroleum ether/ $\text{CHCl}_3$ ; m.p. 242 °C (dec);  $^1\text{H}$ -NMR ( $\text{DMSO}_d_6$ )  $\delta$  4.29 (d, 2H,  $J = 5.7$  Hz,  $\text{CH}_2\text{NH}$ ), 6.54 (t, 1H,  $J = 5.7$  Hz,  $\text{NHCH}_2$ ), 7.20–7.40 (m, 7H, CHAr), 7.84 (s, 1H, CHAr), 7.91 (s, 1H, CHAr), 8.47 (s, 1H, NHPh), 12.69 (s, 1H, NH indazole);  $^{13}\text{C}$ -NMR ( $\text{DMSO}_d_6$ )  $\delta$  43.4, 108.3, 110.7, 120.6, 123.6, 127.3, 127.8, 128.9, 133.6, 134.0, 136.8, 141.2, 156.3.

**N-Benzyl-N'-1H-indazol-6-ylurea (1m).** Brown solid (52% yield); recrystallized from DCM; m.p. 198–199 °C;  $^1\text{H}$ -NMR ( $\text{DMSO}_d_6$ )  $\delta$  4.30 (d, 2H,  $J = 5.7$  Hz,  $\text{CH}_2\text{NH}$ ), 6.63 (t, 1H,  $J = 5.7$  Hz,  $\text{NHCH}_2$ ), 6.82 (dd, 1H,  $J = 8.7$  Hz,  $J = 1.8$  Hz, CHAr), 7.19–7.32 (m, 5H, CHAr), 7.55 (d, 1H,  $J = 8.7$  Hz, CHAr), 7.87 (s, 1H, CHAr), 7.90 (s, 1H, CHAr), 8.72 (s, 1H, NHPh), 12.72 (s, 1H, NH indazole);  $^{13}\text{C}$ -NMR ( $\text{DMSO}_d_6$ )  $\delta$  43.4, 97.2, 114.1, 118.6, 121.1, 127.4, 127.8, 129.0, 133.8, 139.4, 140.9, 141.5, 156.0.

**N-Benzyl-N'-1-naphthylurea (1n).** White solid (79 % yield); recrystallized from MeOH; m.p. 196–197 °C;  $^1\text{H}$ -NMR ( $\text{DMSO}_d_6$ )  $\delta$  4.37 (d, 2H,  $J = 5.7$  Hz,  $\text{CH}_2\text{NH}$ ), 7.06 (t, 1H,  $J = 5.7$  Hz,  $\text{NHCH}_2$ ), 7.22–7.56 (m, 9H, CHAr), 7.86–7.89 (m, 1H, CHAr), 8.02–8.10 (m, 2H, CHAr), 8.64 (s, 1H, NH);

$^{13}\text{C}$ -NMR ( $\text{DMSO-d}_6$ )  $\delta$  43.4, 116.9, 121.8, 122.6, 125.9, 126.2, 126.4, 127.3, 127.7, 127.7, 128.8, 128.9, 134.1, 135.5, 140.6, 156.1.

**N-Benzyl-N'-2-naphthylurea (1o).** White solid (48% yield); recrystallized from MeOH; m.p. 208–210 °C;  $^1\text{H}$ -NMR ( $\text{DMSO-d}_6$ )  $\delta$  4.32 (d, 2H,  $J = 5.7$  Hz,  $\text{CH}_2\text{NH}$ ), 6.71 (t, 1H,  $J = 5.7$  Hz,  $\text{NHCH}_2$ ), 7.45–7.20 (m, 8H, CHAr), 7.70–7.78 (m, 3H, CHAr), 8.04 (s, 1H, CHAr), 8.78 (s, 1H, NH);  $^{13}\text{C}$ -NMR ( $\text{DMSO-d}_6$ )  $\delta$  43.0, 113.2, 120.1, 124.2, 126.9, 127.4, 127.4, 127.8, 128.0, 128.9, 129.0, 129.4, 134.4, 138.8, 141.0, 155.9.

**N-Benzyl-N'-pyridin-2-ylurea (1p).** Yellow solid (54% yield); cyclohexane/EtOAc 1:1 for chromatography; m.p. 148–150 °C;  $^1\text{H}$ -NMR ( $\text{CDCl}_3$ )  $\delta$  6.62 (d, 2H,  $J = 5.7$  Hz,  $\text{CH}_2$ ), 6.82–6.86 (m, 2H, CHAr), 7.25–7.39 (m, 5H, CHAr), 7.53–7.58 (m, 1H, CHAr), 8.10–8.12 (m, 1H, CHAr), 9.00 (s, 1H, NH), 9.80 (s, 1H, NH);  $^{13}\text{C}$ -NMR ( $\text{CDCl}_3$ )  $\delta$  43.9, 112.3, 116.9, 127.2, 127.5, 127.6, 128.7, 138.6, 139.5, 146.0, 153.5, 159.6.

**N-Benzyl-N'-pyridin-3-ylurea (1q).** White solid (56% yield);  $\text{CHCl}_3$ /acetone 7:3 for chromatography; m.p. 154–156 °C;  $^1\text{H}$ -NMR ( $\text{CDCl}_3$ )  $\delta$  6.62 (d, 2H,  $J = 5.7$  Hz,  $\text{CH}_2$ ), 6.82–6.86 (m, 2H, CHAr), 7.25–7.39 (m, 5H, CHAr), 7.53–7.58 (m, 1H, CHAr), 8.10–8.12 (m, 1H, CHAr), 9.00 (s, 1H, NH), 9.80 (s, 1H, NH);  $^{13}\text{C}$ -NMR ( $\text{CDCl}_3$ )  $\delta$  44.2, 122.0, 127.0, 127.6, 128.2, 135.7, 139.7, 140.3, 141.8, 156.1.

**N-Benzyl-N'-phenylurea (1r).** White solid (82% yield); recrystallized from MeOH; m.p. 169–170 °C;  $^1\text{H}$ -NMR ( $\text{DMSO-d}_6$ )  $\delta$  4.28 (d, 2H,  $J = 6.0$  Hz,  $\text{CH}_2$ ), 6.59 (t, 1H,  $J = 6.0$  Hz,  $\text{NHCH}_2$ ), 6.84–6.90 (m, 1H, CHAr), 7.17–7.40 (m, 9H, CHAr), 8.54 (s, 1H, NH);  $^{13}\text{C}$ -NMR ( $\text{DMSO-d}_6$ )  $\delta$  43.4, 118.3, 121.8, 127.4, 127.8, 129.0, 129.4, 141.0, 141.1, 155.9.

**N-Benzyl-N'-(4-hydroxyphenyl)urea (1s).** White solid (99% yield); recrystallized from DCM; m.p. 177–179 °C;  $^1\text{H}$ -NMR ( $\text{DMSO-d}_6$ )  $\delta$  4.24 (d, 2H,  $J = 5.7$  Hz,  $\text{CH}_2\text{NH}$ ), 6.40 (t, 1H,  $J = 5.7$  Hz, NH), 6.60 (d, 2H,  $J = 9.0$  Hz, CHAr), 7.13 (d, 2H,  $J = 8.7$  Hz, CHAr), 7.20–7.32 (m, 5H, CHAr), 8.14 (s, 1H, NH), 8.90 (s, 1H, OH);  $^{13}\text{C}$ -NMR ( $\text{DMSO-d}_6$ )  $\delta$  43.4, 110.5, 102.1, 120.6, 120.7, 120.8, 130.2, 140.1, 150.2, 150.6.

**N-Benzyl-N'-(2,3-dimethoxybenzyl)urea (1t).** White solid (95% yield); recrystallized from MeOH; m.p. 149 °C;  $^1\text{H}$ -NMR ( $\text{DMSO-d}_6$ )  $\delta$  3.70 (s, 3H,  $\text{OCH}_3$ ), 3.77 (s, 3H,  $\text{OCH}_3$ ), 4.20 (d, 2H,  $J = 5.7$  Hz,  $\text{CH}_2\text{NH}$ ), 4.21 (d, 2H,  $J = 6.0$  Hz,  $\text{CH}_2\text{NHPh}$ ), 6.27 (t, 1H,  $J = 5.7$  Hz,  $\text{NHCH}_2$ ), 6.44 (t, 1H,  $J = 6.0$  Hz,  $\text{NHCH}_2\text{Ph}$ ), 6.78–6.81 (m, 1H, CHAr), 6.89–7.02 (m, 2H, CHAr), 7.19–7.31 (m, 5H, CHAr);  $^{13}\text{C}$ -NMR ( $\text{DMSO-d}_6$ )  $\delta$  38.6, 43.6, 56.3, 60.7, 112.1, 120.7, 124.4, 127.2, 127.7, 128.9, 134.7, 141.6, 146.8, 152.9, 158.7.

**N-Benzyl-N'-(3,4-dimethoxybenzyl)urea (1u).** White solid (97% yield); recrystallized from MeOH; m.p. 127 °C;  $^1\text{H}$ -NMR ( $\text{DMSO-d}_6$ )  $\delta$  3.69 (s, 3H,  $\text{OCH}_3$ ), 3.70 (s, 3H,  $\text{OCH}_3$ ), 4.14 (d, 2H,  $J = 5.7$  Hz,  $\text{CH}_2\text{NH}$ ), 4.21 (d, 2H,  $J = 6.0$  Hz,  $\text{CH}_2\text{NHPh}$ ), 6.35 (t, 1H,  $J = 6.0$  Hz,  $\text{NHCH}_2$ ), 6.41 (t, 1H,  $J = 5.7$  Hz,  $\text{NHCH}_2\text{Ph}$ ), 6.73–6.77 (m, 1H, CHAr), 6.84–6.87 (m, 2H, CHAr), 7.17–7.31 (m, 5H, CHAr);  $^{13}\text{C}$ -NMR ( $\text{DMSO-d}_6$ )  $\delta$  43.4, 43.6, 56.0, 56.2, 111.6, 112.3, 119.7, 127.2, 127.6, 128.9, 134.0, 141.7, 148.2, 149.2, 158.7.

**N-N'dibenzylurea (1v).** White solid (94% yield); recrystallized from MeOH; m.p. 170–171 °C;  $^1\text{H}$ -NMR ( $\text{DMSO-d}_6$ )  $\delta$  4.21 (d, 4H,  $J = 6.0$  Hz, 2  $\text{CH}_2\text{NH}$ ), 4.34 (t, 2H,  $J = 6.0$  Hz, 2  $\text{NHCH}_2$ ), 7.16–7.33 (m, 10H, CHAr);  $^{13}\text{C}$ -NMR ( $\text{DMSO-d}_6$ )  $\delta$  43.6, 127.2, 127.7, 128.9, 141.7, 158.8.

**N-Benzyl-N'-(1-phenylethyl)urea (1w).** White needles (82% yield); recrystallized from cyclohexane/DCM; m.p. 116–118 °C;  $^1\text{H}$ -NMR ( $\text{DMSO-d}_6$ )  $\delta$  1.30 (d, 3H,  $J = 7.2$  Hz,  $\text{CH}_3$ ), 4.17 (d, 2H,  $J = 5.7$  Hz,  $\text{CH}_2\text{NH}$ ), 4.73 (m, 1H,  $\text{CHCH}_3$ ), 6.26 (t, 1H,  $J = 5.7$  Hz,  $\text{NHCH}_2$ ), 6.42 (d, 1H,  $J = 8.4$  Hz,  $\text{NHCH}$ ), 7.16–7.32 (m, 10H, CHAr);  $^{13}\text{C}$ -NMR ( $\text{DMSO-d}_6$ )  $\delta$  24.0, 43.4, 49.3, 126.4, 127.1, 127.2, 127.6, 128.8, 141.5, 146.4, 157.9.

**N-Benzyl-N'-butylurea (1x).** White solid (63% yield); DCM/MeOH 95:5 for chromatography; m.p. 100–101 °C;  $^1\text{H}$ -NMR ( $\text{CD}_3\text{OD}$ )  $\delta$  0.92 (t, 3H,  $J = 7.2$  Hz,  $\text{CH}_3$ ), 1.28–1.51 (m, 4H,  $\text{CH}_2\text{CH}_2$ ),

3.12 (t, 2H,  $J = 7.2$  Hz, CH<sub>2</sub>CH<sub>2</sub>NH), 4.29 (s, 2H, CH<sub>2</sub>NH), 7.18–7.32 (m, 5H, CHAr); <sup>13</sup>C-NMR (CD<sub>3</sub>OD)  $\delta$  12.9, 19.8, 32.3, 39.5, 43.5, 126.7, 126.9, 128.2, 140.2, 158.2.

**N-Benzyl-N'-(1-benzylpiperidin-4-yl)urea (1y).** White solid (74% yield); recrystallized from cyclohexane/EtOAc; m.p. 114–116 °C; <sup>1</sup>H-NMR (CDCl<sub>3</sub>)  $\delta$  1.34–1.45 (m, 2H, CH<sub>2</sub> pip), 1.85–2.11 (m, 4H, CH<sub>2</sub> pip), 2.75 (m, 2H, CH<sub>2</sub> pip), 3.46 (s, 2H, CH<sub>2</sub>N), 3.51–3.62 (m, 1H, CH pip), 4.31 (d, 2H,  $J = 5.7$  Hz, CH<sub>2</sub>NH), 4.47 (d, 1H,  $J = 8.1$  Hz, NHCH), 4.87 (t, 1H,  $J = 5.7$  Hz, NHCH<sub>2</sub>), 7.20–7.33 (m, 10H, CHAr); <sup>13</sup>C-NMR (CDCl<sub>3</sub>)  $\delta$  33.0, 44.7, 47.5, 52.5, 63.2, 127.3, 127.5, 127.6, 128.4, 128.8, 129.4, 138.3, 139.4, 157.7.

**N-Benzyl-N'-pyrrolidin-1-ylurea (1z).** White solid (41% yield); DCM/MeOH 95:5 for chromatography; m.p. 124–126 °C; <sup>1</sup>H-NMR (DMSO-*d*<sub>6</sub>)  $\delta$  1.62–1.71 (m, 4H, CH<sub>2</sub> pyr), 2.60–2.82 (m, 4H, CH<sub>2</sub> pyr), 4.20 (d, 2H,  $J = 6.3$  Hz, CH<sub>2</sub>NH), 6.99 (t, 1H,  $J = 6.3$  Hz, NHCH<sub>2</sub>), 7.08 (bs, 1H, NHN), 7.16–7.30 (m, 5H, CHAr); <sup>13</sup>C-NMR (DMSO-*d*<sub>6</sub>)  $\delta$  22.4, 42.8, 55.4, 127.0, 127.5, 128.8, 141.8, 158.9.

**N-Benzyl-4-methylpiperazine-1-carboxamide (1 $\alpha$ ).** White solid (55% yield); DCM/MeOH 95:5 for chromatography; m.p. 127–128 °C; <sup>1</sup>H-NMR (CD<sub>3</sub>OD)  $\delta$  2.30 (s, 3H, CH<sub>3</sub>), 2.42 (t, 4H,  $J = 5.4$  Hz, CH<sub>2</sub> pip), 3.43 (t, 4H,  $J = 5.4$  Hz, CH<sub>2</sub> pip), 4.34 (s, 2H, CH<sub>2</sub>NH), 7.21–7.29 (m, 5H, CHAr); <sup>13</sup>C-NMR (CD<sub>3</sub>OD)  $\delta$  43.2, 44.0, 44.9, 54.4, 126.6, 127.0, 128.1, 140.2, 158.8.

**N-Isoquinolin-5-yl-2-phenylacetamide (2a).** White solid (55% yield); recrystallized from hexane/EtOAc; m.p. 186–188 °C; <sup>1</sup>H-NMR (CDCl<sub>3</sub>)  $\delta$  3.91 (s, 2H, CH<sub>2</sub>), 7.14 (d, 1H,  $J = 5.7$  Hz, CHAr), 7.34–7.29 (m, 5H, CHAr), 7.60 (d, 1H,  $J = 8.1$  Hz, CHAr), 7.78 (d, 1H,  $J = 8.4$  Hz, CHAr), 8.07 (d, 1H,  $J = 7.5$  Hz, CHAr), 8.35 (d, 1H,  $J = 5.4$  Hz, CHAr), 9.18 (s, 1H, CHAr); <sup>13</sup>C-NMR (CDCl<sub>3</sub>)  $\delta$  44.7, 118.4, 120.5, 126.1, 126.2, 126.5, 128.2, 128.4, 128.4, 128.6, 129.9, 141.7, 141.8, 150.5, 173.6.

**N-Isoquinolin-5-yl-3-phenylpropanamide (2b).** White solid (63% yield); recrystallized from hexane/EtOAc; m.p. 133–135 °C; <sup>1</sup>H-NMR (CDCl<sub>3</sub>)  $\delta$  2.87 (t, 2H,  $J = 6.0$  Hz, CH<sub>2</sub>CO), 3.13 (t, 2H,  $J = 7.0$  Hz, CH<sub>2</sub>Ar), 7.14 (d, 1H,  $J = 5.7$  Hz, CHAr), 7.34–7.29 (m, 5H, CHAr), 7.60 (d, 1H,  $J = 8.1$  Hz, CHAr), 7.78 (d, 1H,  $J = 8.4$  Hz, CHAr), 8.07 (d, 1H,  $J = 7.5$  Hz, CHAr), 8.35 (d, 1H,  $J = 5.4$  Hz, CHAr), 9.18 (s, 1H, CHAr); <sup>13</sup>C-NMR (CDCl<sub>3</sub>)  $\delta$  34.6, 35.8, 118.4, 120.5, 126.1, 126.2, 126.5, 128.2, 128.4, 128.4, 128.6, 129.9, 141.7, 141.8, 150.5, 173.6.

**N-(Phenylmethyl)isoquinoline-5-carboxamide (2c).** White solid (70% yield); DCM/MeOH 95:5 for chromatography; m.p. 182–183 °C; <sup>1</sup>H-NMR (CDCl<sub>3</sub>)  $\delta$  4.71 (d, 2H,  $J = 6.0$  Hz, CH<sub>2</sub>NH), 6.58 (t, 1H,  $J = 6.0$  Hz, NHCH<sub>2</sub>), 7.32–7.42 (m, 5H, CHAr), 7.58 (t, 1H,  $J = 6.9$  Hz, CHAr), 7.87 (dd, 1H,  $J = 7.2$  Hz,  $J = 1.2$  Hz, CHAr), 8.03 (d, 1H,  $J = 8.1$  Hz, CHAr), 8.20 (d, 1H,  $J = 6.0$  Hz, CHAr), 8.50 (d, 1H,  $J = 6.6$  Hz, CHAr), 9.20 (s, 1H, CHAr); <sup>13</sup>C-NMR (CDCl<sub>3</sub>)  $\delta$  44.2, 118.5, 126.4, 127.8, 127.9, 128.3, 128.9, 129.5, 130.6, 132.9, 133.2, 137.7, 143.3, 152.2, 167.7.

**N-(2-Phenylethyl)isoquinoline-5-carboxamide (2d).** White solid (58% yield); DCM/MeOH 95:5 for chromatography; m.p. 120–121 °C; <sup>1</sup>H-NMR (CDCl<sub>3</sub>)  $\delta$  2.99 (t, 2H,  $J = 7.2$  Hz, CH<sub>2</sub>Ph), 3.80 (ql, 2H, CH<sub>2</sub>NH), 6.33 (t, 1H,  $J = 6.9$  Hz, NHCH<sub>2</sub>), 7.22–7.35 (m, 5H, CHAr), 7.51 (t, 1H,  $J = 6.9$  Hz, CHAr), 7.69 (dd, 1H,  $J = 6.9$  Hz,  $J = 0.9$  Hz, CHAr), 7.95 (s, 1H, CHAr), 7.98 (d, 1H,  $J = 6.0$  Hz, CHAr), 8.44 (d, 1H,  $J = 6.0$  Hz, CHAr), 9.15 (s, 1H, CHAr); <sup>13</sup>C-NMR (CDCl<sub>3</sub>)  $\delta$  35.5, 41.1, 118.2, 126.3, 126.7, 128.5, 128.7, 128.8, 129.2, 130.3, 132.9, 133.2, 137.8, 143.6, 152.4, 168.0.

**N-Isoquinolin-6-ylbenzenesulfonamide (2e).** Yellow solid (61% yield); m.p. 228–230 °C; <sup>1</sup>H-NMR (CDCl<sub>3</sub>)  $\delta$  7.39 (s, 1H, NHCHAr), 7.43 (d, 2H,  $J = 7.5$  Hz, CHAr), 7.57 (m, 3H, CHAr), 7.66 (d, 2H,  $J = 7.2$  Hz, CHAr), 7.80 (d, 1H,  $J = 6.3$  Hz, CHAr), 7.99 (d, 1H,  $J = 7.8$  Hz, CHAr), 8.30 (d, 1H,  $J = 6.0$  Hz, CHAr), 9.20 (s, 1H, CHAr); <sup>13</sup>C-NMR (CDCl<sub>3</sub>)  $\delta$  116.0, 116.9, 118.4, 123.8, 127.0, 129.2, 129.6, 133.1, 134.7, 140.5, 142.2, 143.1, 153.6.

**1,1-Dimethylethyl [(4-aminophenyl)methyl]carbamate (3).** Di(*tert*-butyl)dicarbonate (1.1 eq) was added to a solution of 4-aminobenzylamine (1 eq) in THF (10 mL), and the mixture was stirred at room temperature. After 2 h, the solvent was evaporated under reduced pressure to give the crude material that was purified by column chromatography, using DCM as eluent. Yellowish solid

(66% yield); m.p. 72–74 °C;  $^1\text{H-NMR}$  ( $\text{CDCl}_3$ )  $\delta$  1.47 (s, 9H,  $\text{CH}_3$ ), 3.54 (bs, 2H,  $\text{NH}_2$ ), 4.18 (d, 2H,  $J = 5.1$  Hz,  $\text{CH}_2\text{NH}$ ), 4.74 (bs, 1H, NH), 6.66 (d, 2H,  $J = 6.9$  Hz, CHAr), 7.07 (d, 2H,  $J = 6.9$  Hz, CHAr);  $^{13}\text{C-NMR}$  ( $\text{CDCl}_3$ )  $\delta$  28.4, 44.3, 115.3, 128.8, 145.2, 152.2, 155.8.

**1,1-Dimethylethyl ({4-[(phenylsulfonyl)amino]phenyl}methyl)carbamate (4).** Pink solid (86% yield); DCM/MeOH 95:5 for chromatography; m.p. 160–161 °C;  $^1\text{H-NMR}$  ( $\text{CDCl}_3$ )  $\delta$  1.43 (s, 9H,  $\text{CH}_3$ ), 4.21 (bs, 2H,  $\text{CH}_2$ ), 4.83 (bs, 1H NH), 7.00–7.13 (m, 5H, 4 CHAr and NH), 7.39–7.78 (m, 5H, CHAr);  $^{13}\text{C-NMR}$  ( $\text{CDCl}_3$ )  $\delta$  28.5, 44.0, 121.9, 127.1, 128.3, 129.0, 133.0, 135.4, 138.9, 147.4, 155.9.

**1,1-Dimethylethyl ({4-[(phenylcarbonyl)amino]phenyl}methyl)carbamate (6).** White solid (72% yield); DCM/MeOH 95:5 for chromatography; m.p. 169–171 °C;  $^1\text{H-NMR}$  ( $\text{CD}_3\text{OD}$ )  $\delta$  1.45 (s, 9H,  $\text{CH}_3$ ), 4.20 (bs, 2H,  $\text{CH}_2$ ), 7.27 (d, 2H,  $J = 8.7$  Hz, CHAr), 7.42–7.59 (m, 3H, CHAr), 7.64 (d, 2H,  $J = 8.7$  Hz, CHAr), 7.90–7.93 (m, 2H CHAr);  $^{13}\text{C-NMR}$  ( $\text{CD}_3\text{OD}$ )  $\delta$  27.3, 43.2, 120.9, 127.1, 127.2, 128.2, 131.4, 127.9, 134.8, 137.3, 155.5, 165.3.

**N-[4-({[(Isoquinolin-5-ylamino)carbonyl]amino}methyl)phenyl] benzensulfonamide (5).** Pink crystals (45% yield); recrystallized from DCM/MeOH; m.p. 117–119 °C;  $^1\text{H-NMR}$  ( $\text{DMSO-}d_6$ )  $\delta$  4.05 (d, 2H,  $J = 5.7$  Hz,  $\text{CH}_2\text{NH}$ ), 6.28 (t, 1H,  $J = 5.7$  Hz,  $\text{NHCH}_2$ ), 6.97–7.11 (m, 5H, CHAr), 7.49–7.74 (m, 10H, CHAr and NH), 9.96 (bs, 1H, NH), 10.22 (s, 1H, CHAr);  $^{13}\text{C-NMR}$  ( $\text{DMSO-}d_6$ )  $\delta$  42.7, 110.0, 112.1, 120.6, 127.1, 128.2, 128.3, 129.6, 133.3, 136.4, 137.1, 139.9, 136.5, 141.5, 143.6, 144.6, 158.3.

**N-[4-({[(Isoquinolin-5-ylamino)carbonyl]amino}methyl)phenyl]benzamide (7).** Yellowish crystals (48% yield); recrystallized from cyclohexane/EtOH; m.p. 200–202 °C;  $^1\text{H-NMR}$  ( $\text{DMSO-}d_6$ )  $\delta$  4.33 (d, 2H,  $J = 5.4$  Hz,  $\text{CH}_2\text{NH}$ ), 7.19 (t, 1H,  $J = 5.4$  Hz,  $\text{NHCH}_2$ ), 7.31–7.95 (m, 11H, CHAr), 8.00 (d, 1H,  $J = 6.6$  Hz, CHAr), 8.31 (d, 1H,  $J = 7.5$  Hz, CHAr), 8.51 (d, 1H,  $J = 5.1$  Hz, CHAr), 8.88 (bs, 1H, NH), 9.25 (bs, 1H, NH), 10.24 (s, 1H, CHAr);  $^{13}\text{C-NMR}$  ( $\text{DMSO-}d_6$ )  $\delta$  42.8, 114.9, 119.6, 120.8, 121.5, 128.0, 128.1, 128.8, 130.3, 131.9, 137.1, 138.4, 139.5, 142.7, 146.9, 153.0, 155.8, 165.8.
